1 **Comprehensive analysis using DNA metabarcoding, PCR, and HPLC**  
2 **unveils the adulteration in Brahmi herbal products**

3

4 **Abhi P. Shah#, Tasnim Travadi#, Sonal Sharma, Ramesh Pandit, Chaitanya**  
5 **Joshi, and Madhvi Joshi\***

6 Gujarat Biotechnology Research Centre (GBRC), Department of Science and Technology,  
7 Gandhinagar, Government of Gujarat, India.

8 #Equal contribution

9

10

11

12 **\*Corresponding Author**

13 **Dr. Madhvi Joshi,**

14 Scientist-D and Joint Director,

15 Gujarat Biotechnology Research Centre (GBRC),

16 Department of Science and Technology, Gandhinagar,

17 Government of Gujarat, India.

18 Tel.: +91- 99784 41233.

19 Email: [madhvimicrobio@gmail.com](mailto:madhvimicrobio@gmail.com)

20 **ORCID: [orcid.org/0000-0003-4102-7114](https://orcid.org/0000-0003-4102-7114)**

21

22

## 23 **Abstract**

24 *Background:* The herbal products market is expanding and creating a bottleneck for raw  
25 materials. Hence, economically motivated adulteration has a high prevalence. DNA barcoding  
26 and species-specific PCR assays are now revolutionising the molecular identification of herbal  
27 products and are included in a number of pharmacopoeias for the identification of raw  
28 materials. High-throughput sequencing with barcoding advances toward metabarcoding, which  
29 enables the identification of unintentionally or intentionally unlabelled plant material present  
30 in herbal products. Brahmi is one of the most commercially significant and nootropic  
31 botanicals, with great controversy over the terms "Brahmi" being used to describe both *Bacopa*  
32 *monneri* (BM) and *Centella asiatica* (CA) species.

33 *Purpose:* This study evaluates DNA-based methods for Brahmi herbal products with the  
34 traditional HPLC-based analytical approach in order to assess their effectiveness.

35 *Methods:* We employed a species-specific PCR assay, DNA metabarcoding using *rbcL*  
36 minibarcode, and HPLC to detect the presence of the Brahmi (either BM or CA) in eighteen  
37 market samples. All the methods have been validated using in-house blended formulations.

38 *Results:* Comprehensive analysis of all three methods revealed the presence of 22.2%, 55.6%,  
39 and 50.0% of Brahmi by PCR assay, DNA metabarcoding, and HPLC, respectively, in Brahmi  
40 market formulations, whereas blended formulations only exhibited targeted plant species with  
41 all three methods.

42 *Conclusion:* Species-specific PCR can be used as a cost-effective and rapid method to detect  
43 the presence of the Brahmi, while in high-throughput methods, DNA metabarcoding can be  
44 used to detect the presence of widespread adulterated botanicals, and further, bioactive  
45 compounds could be detected by HPLC. These results emphasise the need for quality control

46 of the marketed Brahmi herbal products as well as the implementation of all methodologies in  
47 accordance with fit for purpose.

48

49 *Key Words:* Adulteration, *Bacopa monneri*, Brahmi, *Centella asiatica*, DNA metabarcoding,

50 Species-specific PCR assay

51

52

## 53 **Introduction**

54           Traditional medical knowledge was gleaned and updated through centuries of empirical  
55 testing. The rapid expansion of the traditional medicine market is a burning issue on a global  
56 scale, as the quality of botanicals is being compromised either unintentionally by  
57 substitute/adulteration due to a lack of taxonomic knowledge, different vernacular  
58 nomenclature, and cryptic taxa morphology or intentionally by economically motivated  
59 adulteration (Ichim, 2019; Raclariu et al., 2018a). The use of taxonomic and analytical  
60 techniques for the authentication of medicinal plants are widely acknowledged around the  
61 world, but the regulatory framework and guidelines for quality assessment may vary based on  
62 whether they are used as herbal products or dietary supplements (Joshi et al., 2017; Liu et al.,  
63 2018; Sahoo and Manchikanti, 2013). The resolution power of the analytical methods is greatly  
64 influenced by environmental factors, differences in processing and storage conditions. In  
65 addition to that, analytical methods cannot differentiate between an untargeted adulteration and  
66 substitution, however, the ability to accurately identify the therapeutic component makes them  
67 important for quality assurance and consumer safety (Raclariu et al., 2017). There is a lack of  
68 centralized authentication systems that provide taxon identification with high-resolution  
69 power. The predominance of species-specific PCR assays (Noh et al., 2021; Sharma and  
70 Shrivastava, 2016) DNA barcoding (Bansal et al., 2018; Seethapathy et al., 2015; Thakur et al.,  
71 2019; Vassou et al., 2016), and metabarcoding (Raclariu et al., 2017; Raclariu et al., 2017;  
72 Raclariu et al., 2018b; Seethapathy et al., 2019) based molecular authentication of medicinal  
73 plants has recently undergone a revolution, mostly because of DNA's accessibility, consistency,  
74 and independence from tissue characteristics, age, harvesting techniques, and storage  
75 conditions. Chinese Pharmacopoeia, United States Pharmacopeia, British Pharmacopoeia,  
76 Japanese Pharmacopoeia, and Hong Kong Chinese Materia Medica are advocating DNA-based  
77 authentication around the globe (Wu and Shaw, 2022). Species-specific PCR assays and DNA

78 barcoding can provide identification of single or targeted plants at a lower cost, while high-  
79 throughput sequencing-based metabarcoding can concurrently identify multiple taxon from the  
80 mixture of DNA obtained from herbal products.

81         Brahmi is herbal therapeutics mentioned in traditional medicine for the treatment of  
82 neurological and psychiatric disorders like loss of memory, cognitive deficits, and impaired  
83 mental function (Shinomol et al., 2011). Brahmi is a classic illustration of controversial  
84 drugs/sandigdha dravya as *Bacopa monnieri* L. (BM) (also known as waterhyssop, herb of  
85 grace, Brahmi, thyme-leaved gratiola, Indian pennywort) and *Centella asiatica* L. (CA) (also  
86 known as Mandukparni, Asiatic pennywort, Jalbrahmi, and Gotu kola), because of parallel  
87 evolving knowledge systems, currently used polynomial nomenclature in Sanskrit, varying  
88 perceptions in various communities, and vernacular equivalent (Keshari, 2021). The  
89 therapeutic effectiveness of both is very similar despite having different family classifications  
90 and taxonomy is due to having similar functional groups in secondary metabolites (Kashmira  
91 J Gohil, 2020). Around the globe \$320 million market value estimated for Brahmi by 2026.  
92 The Asia-Pacific area is the largest trading sector for Brahmi, with India and China being major  
93 exporters (<https://www.industryarc.com/Research/Brahmi-Market-Research-507354>).  
94 Traditional markets, as well as Brahmi consumption, are prosperous in Northern America and  
95 Europe due to natural thus fewer side effects ideology, traditional value, and accessible  
96 availability ([https://articlewire24.wordpress.com/2017/12/28/brahmi-market-size-and-  
97 industry-forecast-2025-market-shares-and-strategies-of-key-players/](https://articlewire24.wordpress.com/2017/12/28/brahmi-market-size-and-industry-forecast-2025-market-shares-and-strategies-of-key-players/)).

98         In our previous studies, we have used plant DNA metabarcoding (Pandit et al., 2021)  
99 and species-specific primers (Travadi et al., 2022) for the detection of adulteration in herbal  
100 formulations. In this study, we investigated adulteration in Brahmi market samples using three  
101 different approaches including species-specific PCR assay, metabarcoding and HPLC. The first  
102 objective of this study was to develop a rapid, affordable and simple PCR-based assay for the

103 detection of BM or CA in Brahmi herbal products. The second objective was to detect a wide  
104 range of botanical adulterations in Brahmi herbal products using a DNA metabarcoding  
105 approach using an in-house developed *rbcL* minibarcode. The third objective is to employ  
106 established analytical techniques to confirm the presence of bioactive components. All of the  
107 three techniques have been validated by mimicking possible blended formulations. The aim of  
108 this study is to evaluate DNA-based methods for Brahmi herbal products by comparing them  
109 with the conventional HPLC-based analytical strategy advocated by the Indian Pharmacopoeia.

## 110 **Materials and Methods**

### 111 **Sample description**

112 *Centella asiatica* (CA) and *Bacopa monnieri* (BM) plants were collected from the Maharaja  
113 Sayajirao University (MSU), Vadodara, India with the help of taxonomists. Herbarium  
114 vouchers of both plants were developed and submitted at the institutional herbarium with the  
115 following voucher specimen IDs: CA: BG-181130-0005; BM: BG-181130-0018. Further, a  
116 total of 18 market samples of different companies tagged as ‘Brahmi churna/powder and vati’  
117 were procured from the local market and e-commerce (Table S1).

### 118 **Preparation of simulated plant mixtures and DNA extraction**

119 BM and CA whole plant species were shed-dried, grinded into a fine powder and mixed in  
120 proportions (w/w%) as follows. 1) BS1: 100% BM powder 2) BS2: 100% CA powder 3) BS3:  
121 75% BM powder in 25% CA powder 4) BS4: 50% BM powder in 50% CA powder 5) BS5:  
122 25% BM powder in 75% CA powder for preparing 100 mg of simulated blended formulations  
123 for the validation of PCR assay, metabarcoding and HPLC. Qiagen-DNeasy plant power pro  
124 kit (Qiagen, Germany) was used for extracting DNA from the BM and CA blended whole plant  
125 materials as well as from the market samples. DNA was extracted as per the manufacturer’s  
126 instruction from 100 mg BM and CA blended materials and 100 mg powder of market samples.  
127 During DNA extraction, proper precautions were taken to avoid cross-contamination. The *rbcL*

128 gene was amplified to ensure the DNA quality using primers and thermal cycler conditions as  
129 described by Travadi et al. (2022).

## 130 **Development of PCR assay for detection of BM and CA**

### 131 **Designing of primers**

132 For designing CA-specific primers, ITS sequences of BM and CA were retrieved from the  
133 NCBI and aligned using ClustalW. Alignment was done to find out nucleotides that differed  
134 between the two species. CA-specific primers were designed by considering polymorphic sites.  
135 Two online software, Oligocalc (Kibbe, 2007) and Primer 3 version 4.0.0 (Rozen and  
136 Skaletsky, 2000) were used to examine primer sequences for their optimal characteristics such  
137 as length, and melting temperature compatibility, GC content, hairpin formation, and secondary  
138 structure formation. The NCBI primer BLAST tool was used to examine the specificity and  
139 selectivity of the primers. For determining BM, sequence characterized amplified region  
140 (SCAR) primers designed by (Yadav et al., 2012) were used in this study.

### 141 **Optimization of PCR assay**

142 The annealing temperature for BM and CA primers were optimized in such a way that  
143 provided higher sensitivity with optimum specificity. A total of 20  $\mu$ L reaction mixture was  
144 prepared comprising of 10  $\mu$ L KAPA HiFi HotStart ReadyMix (Roche); 1  $\mu$ L forward and  
145 reverse primers (5 pmol each); 2  $\mu$ L total genomic DNA (10-15 ng/ $\mu$ L); 2  $\mu$ L bovine serum  
146 albumin (BSA) (2 mg/L); nuclease-free water for the make-up final volume. A thermal cycler  
147 was run with the following conditions to optimize annealing temperature; initial denaturation  
148 at 95°C for 3 minutes, followed by 30 cycles of denaturation at 98 °C for 20 seconds, annealing  
149 temperature from 64 to 72 °C (with an interval of 2 °C) for 15 seconds and extension at 72 °C  
150 for 20 seconds, and final extension 72 °C for 20 seconds. For determining primer's sensitivity,  
151 0.001, 0.01, 0.1, 0.25, 0.5, and 1 ng of genomic DNA of BM and CA were amplified with  
152 optimized PCR conditions. To ensure the specificity and efficacy of optimized PCR assays,

153 inter-species amplification using a mixer of BM and CA plant material was also executed. PCR  
154 assays were performed with BM and CA-specific primers and optimized PCR conditions using  
155 10-15 ng of DNA from prepared simulated blended formulations. Optimized PCR conditions  
156 were further used for the detection of BM and CA in market samples.

### 157 **DNA metabarcoding**

158 For metabarcoding, we have designed *in-house* plant mini-barcodes targeting the *rbcL* gene  
159 and it was validated by performing Next Generation Sequencing (NGS) assay on authenticated  
160 plant mixture (data not shown here). The same primers were used in this study.

#### 161 2.3.1 DNA metabarcoding of blended formulations and market samples

162 The optimized PCR reaction setup and thermal cycling condition were used as mentioned  
163 above for metabarcoding of blended formulations and market samples. Amplified PCR  
164 products were purified using AMPure XP beads (Beckman Coulter). Quantification of purified  
165 PCR products was determined by Qubit 4.0 Fluorometer using the 1X dsDNA HS Assay Kit  
166 (Thermo Fisher Scientific, MA, USA). Purified PCR products were mixed into equimolar  
167 concentrations (100 pmol) and subjected to emulsion PCR (emPCR) for clonal amplification.  
168 Emulsion PCR was carried out using Ion 520™ & Ion 530™ Kit-OT2 reagent solutions  
169 (Thermo Fisher Scientific, MA, USA) with 400-bp chemistry as per manufacturer guideline.  
170 Enrichment of template-positive Ion Sphere™ Particles (ISPs) was carried out using the Ion  
171 OneTouch™ ES Instrument (Thermo Fisher Scientific, MA, USA). Sequencing was performed  
172 on the Ion GeneStudio™ S5 Plus (Thermo Fisher Scientific, MA, USA) using the Ion S5™  
173 sequencing solutions and reagents and loaded on the Ion 530™ sequencing chip (Thermo  
174 Fisher Scientific). The efficacy of the metabarcoding assay was confirmed using simulated  
175 plant mixtures prepared as mentioned above.



## 176 **DNA metabarcoding data analysis**

177           The generated reads were filtered using PRINSEQ v0.20.4.31 (Schmieder and Edwards,  
178 2011) on the basis of average quality score and length. Reads with an average quality score Q  
179 < 20 and reads with length <300 bp or >350 bp were discarded. Obtained filtered reads of each  
180 sample were clustered using CD-HIT (Huang et al., 2010) at 99% identity. A representative  
181 sequence of each cluster having a minimum of five reads was further analyzed using NCBI-  
182 BLASTn (Altschul et al., 1990). To normalize data, the percentage of analysed reads is  
183 considered as 100% for determination of percent distribution of each plant.

## 184 **HPLC analysis**

185           Authentic plant samples, simulated blended formulations and market samples were  
186 extracted using methanol (1:10 w/v) to determine the presence of bacoside A (chemical marker  
187 used to detect BM) and asiaticoside (chemical marker used to detect CA). Each extract was  
188 filtered through a 0.22 µm pore size syringe filter (HiMedia Laboratories, Mumbai, India) and  
189 20 µL of the filtered extract was injected into a high-performance liquid chromatographic  
190 (HPLC). HPLC analysis was performed on the Shimadzu (Kyoto, Japan) system consisting of  
191 an LC-20AP pump with SPD-M20A photodiode array detector (PAD) and C18 analytical  
192 column (250 × 4.6 mm; i.d.: 5 µm). Analytical separations were carried out using a gradient of  
193 acetonitrile (A) and water containing 0.05% (v/v) orthophosphoric acid (B) as the mobile  
194 phase. The elution program was 0–25 min from 30:70 (A: B) to 40:60 (A: B), and 25–35 min  
195 from 40:60 (A: B) to 60:40 (A: B). The flow rate was 1.5 mL/min and detection was performed  
196 at 205 nm (Indian pharmacopoeia 2007, volume 3; Deepak et al. 2005). Commercially  
197 available reference standard bacoside A and asiaticoside (Sigma-Aldrich) was injected (20 µL)  
198 in HPLC in (1000 µg/mL) to obtain the chromatograms of both standards.

## 199 **Results and Discussion**

### 200 **DNA extraction and *rbcL* gene amplification**

201 The total DNA concentration ranges from 4.7–6.7 µg and 1.22–29.2 µg from the blended  
202 mixture and market samples, respectively (Table S2). Herbal products are processed and  
203 enriched with secondary metabolites such as polysaccharides, flavonoids, and polyphenols that  
204 are reportedly co-precipitated along with the sheared DNA and inhibit PCR amplification  
205 (Fazekas et al., 2009; Mishra et al., 2016a; Parveen et al., 2016). DNA integrity and quality  
206 were checked using the *rbcL* gene from all the extracted DNA. In all the samples, we were  
207 successfully able to amplify the *rbcL* gene, which revealed that the quality of extracted DNA  
208 is suitable for PCR amplification (Fig. S1).

### 209 **PCR based authentication of Brahmi market samples**

210 The emergence and development of DNA-based technology has enabled the cost-effective,  
211 rapid, and yet sensitive and species- specific PCR assays to authenticate medicinal plants.  
212 Species-specific sequence-characterized amplified region (SCAR) markers, nuclear ribosomal  
213 internal transcribed spacer (nrITS) sequences, and different plastid markers (e.g., *rbcL*, *trnH*-  
214 *psbA*, and *matK*) have been extensively used to authenticate plant species (de Boer et al., 2015;  
215 Mishra et al., 2016b; Sharma and Shrivastava, 2016; Xin et al., 2018). Earlier studies have  
216 revealed a PCR-based assay for the authentication of herbal products. For instance, Noh et al.  
217 (2021) developed a PCR assay for the authentication of medicinal mistletoe species; Zhang et  
218 al. (2018) developed a PCR-based assay kit for the authentication of *Zaocys dhumnades* in  
219 traditional Chinese medicine. Similarly, as mentioned earlier, we have also developed a PCR  
220 assay for the detection of *Ocimum* sp. in Tulsi churna (Travadi et al. 2022).

221 To check the presence of either BM or CA in Brahmi products, we developed a species-  
222 specific primer for CA using ITS region (sequence of primers not shown here), and for BM,  
223 we used a SCAR-BM specific marker designed by Yadav et al. (2012). PCR assay optimization

224 revealed that 65 °C is the optimum annealing temperature for both primer sets using KAPA  
225 HiFi HotStart ready mix (Fig. S2). The results of the sensitivity experiment demonstrated that  
226 the target DNA sequence was amplified successfully using BM and CA primers from 0.1 ng  
227 of total DNA (Fig. S3). No cross-amplification was observed when BM and CA primers were  
228 used with the blended formulation, and on the agarose gel, there was a band intensity gradient  
229 proportional to the percentage of plant present in the blended formulations (Fig. 1a; 1b). This  
230 established and validated the applicability of both primers. In addition, a PCR assay of Brahmi  
231 market samples revealed that out of 18 samples, four samples (i.e. 22.2% samples) showed  
232 amplification for the targeted species. Only two market samples with the labels 100 and 159  
233 were found to detect CA, whereas two samples with the labels 220 and 223 had the presence  
234 of BM (Fig. 2). The absence of the target bands in the rest of the market samples could be  
235 attributed to the presence of counterfeit plant materials in substantial amounts.

### 236 **Metabarcoding of simulated blended formulations and market samples**

237 The raw data consists of a total of 138127 reads with a mean read length of 311 bp. A  
238 total of 105353 (76.27%) reads passed our filtering quality criteria, and the mean read length  
239 of filtered reads was 338 bp (Table 1). Table 1 shows the total raw reads and percentage of  
240 reads acquired after filtering with the mean read length of each sample, as well as the  
241 percentage of analysed reads. To mitigate the effect of sequencing errors that are known to  
242 affect the Ion Torrent sequencing platform, we used a 99% OTU clustering threshold with a  
243 minimum of five reads per cluster (Loman et al., 2012; Salipante et al., 2014). Substantiation  
244 of the DNA metabarcoding method is required before its implementation for market samples.  
245 Therefore, here we have performed metabarcoding of blended formations of BM and CA.  
246 Blended formulations comprising 100% BM (BS1) showed 100% reads for BM, 100% CA  
247 (BS2) showed 100% reads for CA, 75% BM +25% CA (BS3) showed 79.4% reads for BM and  
248 20.6% reads for CA, 50% BM +50% CA (BS4) showed 48.4% reads for BM and 51.6% reads

249 for CA, 25% BM + 75% CA (BS5) showed 23.9% reads for BM and 76.1% reads for CA (Fig.  
250 3, 4). This data demonstrated the accuracy of our metabarcoding pipeline and its suitability for  
251 market samples.

252 A total of 119 species, 113 genera and 41 families have been identified from the market  
253 samples. Only four of the 18 market samples, labelled 100, 159, 223, and V47 showed 99.65%,  
254 91.44%, 2.04% and 56.89% reads for CA, respectively, and five market samples labelled 102,  
255 214, 215, 216, 219, 220, 223 showed 1.36%, 0.24%, 0.18%, 7.42%, 0.95%, 68.28% reads  
256 respectively for BM (Fig. 3, Fig. 4). A total of 12 different plant species were shown to be a  
257 prominent adulterant (covered >35% reads) in Brahmi market samples. For instance, sample  
258 99 and 218 comprised 82.14% and 78.3% reads respectively for *Ipomoea batatas* (Family:  
259 Convolvulaceae); sample 101 comprised 76.12% reads of *Eclipta alba* (Family: Asteraceae);  
260 sample 102 comprised 61.6% reads of *Senna obtusifolia* (Family: Fabaceae); sample 203 and  
261 223 comprise 79.3% and 34.6% reads respectively for *Momordica charantia* (Family:  
262 Cucurbitaceae); sample 214 comprised 45.6% reads of *Ocimum tenuiflorum* (Family:  
263 Lamiaceae); sample 215 comprised 41.36% reads of *Azadirachta indica* (Family: Meliaceae);  
264 sample 216 comprised 51.95% reads of *Murraya koenigii* (Family: Rutaceae); sample 217  
265 comprised 79.5% reads of *Xanthium sibiricum* (Family: Asteraceae); sample 219 comprised  
266 65.23% reads of *Tephrosia candida* (Family: Fabaceae); sample 221 comprised 64.3% reads  
267 of *Ziziphus spina-christi* (Family: Rhamnaceae); sample 222 comprised 94.38% reads of  
268 *Trachyspermum ammi* (Family: Apiaceae); sample 224 comprised 84.7% reads of *Withania*  
269 *somnifera* (Family: Solanaceae) (Fig. 3). Plant species and their percentage reads that are allied  
270 with others in Fig. 3 are listed in Table S3. The number of species detected per sample ranged  
271 from 2 to 28, with an average of 12.8 species in market samples.

272 A total of 44.4% samples exhibited 100% reads for non-targeted plants, 27.78%  
273 samples showed 90 to 99.8% reads for non-targeted plants, and 55.6% samples showed reads

274 in the range of 0.18 to 99.65% for Brahmi (either BM or CA or both) (Fig. 4a). At family level,  
275 Fabaceae, Asteraceae, Lamiaceae, Solanaceae are prominent adulterants with presence in  
276 minimum 10 samples with 77.8 %, 61.1%, 61.1% and 55.5% occurrences (Fig. 4b). On the  
277 whole, this result emphasizes that a larger number of plant species have been detected in market  
278 herbal products while we did not observe non-targeted plant species in-house prepared blended  
279 formulations. The presence of unlabelled species might be deceiving, as DNA metabarcoding  
280 is one of the highly sensitive methods that can detect even trace amounts of contamination. For  
281 instance, pollen contamination because of wind-pollinated species during the stage of  
282 cultivation and harvesting, during transport, storage, production, and packing other plant  
283 species contaminated by inadequately cleaned containers, conveyors, and other equipment  
284 (Newmaster et al., 2013; Ivanova et al., 2016; Liu et al., 2018). However, DNA metabarcoding  
285 could only be applied for quality assessment to check the presence of labelled species and/or  
286 other non-listed botanicals, substitutes, and fillers in herbal products. The final results are  
287 influenced by a number of variables, including DNA quality and quantity proportional to the  
288 plant species and its biasness; DNA that can be removed or degraded during processing; PCR  
289 amplification bias due to poor primer fit and compatibility degree variation with different  
290 species; library preparation; sequencing platform; metabarcoding data analysis parameters;  
291 molecular identification algorithm; and reference databases (Pawluczyk et al., 2015; Staats et  
292 al., 2016). NCBI GenBank databases comprise non-curated databases which might lead to  
293 incorrect identification to the reference sequences at lower taxonomic level. However, NCBI  
294 GenBank can be used for identification at higher taxonomic levels (Hinchliff and Smith, 2014).

### 295 **Detection of chemical markers of BM and CA in market samples**

296 A chemical marker-based authentication of BM and CA has been well demonstrated in the  
297 Indian pharmacopoeia (Indian pharmacopoeia 2007, volume 3). In the present study, the most  
298 commonly identified chemical markers bacoside A and asiaticoside were examined in Brahmi

299 herbal products and blended formulations for validating DNA-based methods. Bacoside A is  
300 composed of four different triglycosidic saponins: bacoside A3, bacopaside II, bacopasaponin  
301 C, and the jujubogenin isomer, and it is the key bioactive constituent or chemical marker  
302 responsible for the pharmacological effects of BM, while asiaticoside is the most abundant  
303 triterpene glycoside found in the CA and is responsible for the pharmacological activities of  
304 CA (Deepak et al., 2005; Shinomol et al., 2011).

305 In HPLC chromatogram, a reference standard bacoside A gave four major peaks  
306 corresponding to bacoside A3 (1), bacopaside II (2), jujubogenin, isomer of bacopasaponin C  
307 (3), and bacopasaponin C (4) between retention time 20 to 25 min and reference standard  
308 asiaticoside gave a peak at retention time 5.08 min (Fig. S4). HPLC chromatogram of blended  
309 formulations showed peaks in the asiaticoside and bacoside A region which corresponds to  
310 their composition. For intense, 100% BM exhibited HPLC fingerprint at bacoside A region,  
311 100% CA exhibited HPLC fingerprint at asiaticoside region, and admixture of BM and CA  
312 exhibited HPLC fingerprints of both (Fig. S5). Samples 102, 214, 216, 219, 220, and 223  
313 showed similar qualitative HPLC fingerprints in the bacoside A region demonstrating the  
314 presence of BM. Samples 100, 159, and V47 showed a peak of asiaticoside obtained at a  
315 retention time (Rt) of 5.08 min demonstrating the presence of CA. The remaining nine samples  
316 (i.e. 50% samples) did not exhibit peaks corresponding to bacoside A or asiaticoside (Fig. 5).

### 317 3.1 Comparative results of all three approaches

318 Comparative results of PCR assay, DNA metabarcoding, and HPLC methods carried out in this  
319 study for detection of BM and CA in herbal products are represented in Table 2. In sample 223,  
320 BM and CA both are detected through metabarcoding, while by PCR-based approach and  
321 HPLC only BM was detected. In samples 102, 214, 216, and 219, BM was detected by HPLC  
322 and metabarcoding method but not through PCR-based approach and the presence of CA was  
323 detected by HPLC and metabarcoding method but not through PCR based approach in sample

324 V47. This might be due to the availability of lower copy numbers of SCAR (used for BM  
325 detection)/ITS (used for CA detection) markers than *rbcL* markers, and in vati sample it could  
326 be due to the presence of impurities in the extracted DNA, as we observed lower *rbcL* gene  
327 amplification intensity in this sample (Fig. S1). Conclusively, presence of Brahmi (BM and  
328 CA) was detected in four samples (22.22%) by PCR based assay, in ten samples (55.56%) by  
329 metabarcoding and in nine samples (50.0%) by HPLC and in 8 samples (44.4%) BM and CA  
330 was not detected by all three methods. There were labels on market products for *Bacopa*  
331 *monnieri* on nine out of the 18 samples, but none had labels for *Centella asiatica* (Table S1).  
332 However only four of them had BM, while one of them had CA instead of BM. From the  
333 remaining 9 samples, where no species was mentioned on the label, BM and CA were found  
334 in 3 and 2 samples, respectively. The low level of fidelity raises concerns about the safety and  
335 reliability of Brahmi herbal products, especially in the context of discrepancies between  
336 labelling and constituents.

### 337 **Conclusion**

338 Comprehensive analysis of species-specific PCR, DNA metabarcoding, and HPLC for  
339 detection of BM and CA in herbal products revealed that DNA metabarcoding has benefits in  
340 terms of detection of a wide range of non-targeted adulterations. While HPLC is able to detect  
341 bioactive compounds, which are preferred in the identification and monitoring of the  
342 therapeutic potential of drugs, a straightforward species-specific PCR approach, which is rapid,  
343 affordable, and simple to analyse and handle, can overpower DNA metabarcoding and HPLC  
344 in terms of cost and experimental simplicity. From the collection of raw materials to the final  
345 furnished products, quality control of herbal products comprises various layers of investigation  
346 and authentication. Species-specific PCR, DNA metabarcoding, and HPLC approaches have  
347 distinct technological requirements, expenses, and levels of specialized knowledge required to  
348 provide a quality assessment of herbal products with defined applicability and inapplicability.

349 The implementation of multiple or orthogonal authentication approaches, which are aligned to  
350 the concept of "fit-for-purpose," is the need of the hour in quality control and safety of herbal  
351 products.

## 352 **Acknowledgment**

353 Gujarat State Biotechnology Mission (GSBTM), Gandhinagar, Gujarat, India, has provided  
354 financial support for the project under the Research Support Scheme, grant ID  
355 GSBTM/JDRD/584/2018/204. The authors would like to thank Prof. Padamnabhi S. Nagar,  
356 The Maharaja Sayajirao University of Baroda, India for helping us in plant collection and  
357 authentication, Mr. Dipesh Parikh, Technical assistance, GBRC for carrying out HPLC, Mr.  
358 Nitin Savaliya, Technical assistance from Thermo Fisher Scientific, for NGS instrument  
359 handling and run setup.

## 360 **Conflict of Interest**

361 The sequence of CA primers and the PCR conditions have been applied for a patent  
362 (Application Number-202221035088).

## 363 **Author contribution**

364 APS: Performed experiments, Data analysis, Writing and Editing manuscript, Validation of  
365 final manuscript; TT: Performed molecular biology experiments, Data analysis, Writing  
366 manuscript and validation; RP: Designed primers for metabarcoding, established  
367 metabarcoding data analysis pipeline, Manuscript editing; SS: Designed primers for CA,  
368 performed molecular biology experiments, Manuscript editing; CJ: Project administration,  
369 Methodology, Supervision, and Review & Editing; MJ: Principal Investigator,  
370 Conceptualization, Methodology, Supervision, and Review & Editing.

## 371 **Data availability statement**

372 All data generated or analysed during this study are included in this article and its  
373 supplementary information files.



## 374 **References**

- 375 Altschul, S.F., Gish, W., Miller, W., Myers, E.W. and Lipman, D.J., 1990. Basic local alignment search tool. *J*  
376 *Mol Biol.* 215:403–410. [https://doi.org/10.1016/S0022-2836\(05\)80360-2](https://doi.org/10.1016/S0022-2836(05)80360-2)
- 377 Bansal, S., Thakur, S., Mangal, M., Mangal, A.K., Gupta, R.K., 2018. DNA barcoding for specific and sensitive  
378 detection of *Cuminum cyminum* adulteration in *Bunium persicum*. *Phytomedicine* 50, 178–183.  
379 <https://doi.org/10.1016/j.phymed.2018.04.023>
- 380 de Boer, H.J., Ichim, M.C., Newmaster, S.G., 2015. DNA barcoding and pharmacovigilance of herbal medicines.  
381 *Drug Saf.* 38, 611–620.
- 382 Deepak, M., Sangli, G.K., Arun, P.C., Amit, A., 2005. Quantitative determination of the major saponin mixture  
383 bacoside A in *Bacopa monnieri* by HPLC. *Phytochem. Anal.* 16, 24–29. <https://doi.org/10.1002/pca.805>
- 384 Fazekas, A.J., Kesanakurti, P.R., Burgess, K.S., Percy, D.M., Graham, S.W., Barrett, S.C.H., Newmaster, S.G.,  
385 Hajibabaei, M., Husband, B.C., 2009. Are plant species inherently harder to discriminate than animal species  
386 using DNA barcoding markers? *Mol. Ecol. Resour.* 9, 130–139. [https://doi.org/10.1111/j.1755-](https://doi.org/10.1111/j.1755-0998.2009.02652.x)  
387 [0998.2009.02652.x](https://doi.org/10.1111/j.1755-0998.2009.02652.x)
- 388 Ivanova N V., Kuzmina ML, Braukmann TWA, Borisenko A V., Zakharov E V. (2016) Authentication of herbal  
389 supplements using next-generation sequencing. *PLoS ONE* 11, 1–24. doi:10.1371/journal.pone.0156426.
- 390 Hinchliff, C.E., Smith, S.A., 2014. Some limitations of public sequence data for phylogenetic inference (in plants).  
391 *PLoS One* 9. <https://doi.org/10.1371/journal.pone.0098986>
- 392 Huang, Y., Niu, B., Gao, Y., Fu, L., Li, W., 2010. CD-HIT Suite: A web server for clustering and comparing  
393 biological sequences. *Bioinformatics* 26, 680–682. <https://doi.org/10.1093/bioinformatics/btq003>
- 394 Ichim, M.C., 2019. The DNA-based authentication of commercial herbal products reveals their globally  
395 widespread adulteration. *Front. Pharmacol.* 10, 1–9. <https://doi.org/10.3389/fphar.2019.01227>
- 396 Indian Pharmacopoeia., 2007. Indian pharmacopoeia 2007 – Volume 3. Ghaziabad: Indian Pharmacopoeia  
397 Commission.
- 398 Joshi, V.K., Joshi, A., Dhiman, K.S., 2017. The Ayurvedic Pharmacopoeia of India, development and  
399 perspectives. *J. Ethnopharmacol.* 197, 32–38.
- 400 Kashmira J Gohil, 2020. Exploring the potential of *Centella asiatica* and *Bacopa monnieri* in immunodeficiency  
401 disorders in women : Two herbs as Holy Grail 6, 1–12.
- 402 Keshari, P., 2021. Controversy, Adulteration and Substitution: Burning Problems in Ayurveda Practices.

- 403 Kibbe, W.A., 2007. OligoCalc: An online oligonucleotide properties calculator. *Nucleic Acids Res.* 35, 43–46.  
404 <https://doi.org/10.1093/nar/gkm234>
- 405 Liu, C., Guo, D. an, Liu, L., 2018. Quality transitivity and traceability system of herbal medicine products based  
406 on quality markers. *Phytomedicine* 44, 247–257. <https://doi.org/10.1016/j.phymed.2018.03.006>
- 407 Loman, N.J., Misra, R. V., Dallman, T.J., Constantinidou, C., Gharbia, S.E., Wain, J., Pallen, M.J., 2012.  
408 Performance comparison of benchtop high-throughput sequencing platforms. *Nat. Biotechnol.* 30, 434–439.  
409 <https://doi.org/10.1038/nbt.2198>
- 410 Mishra, P., Kumar, A., Nagireddy, A., Mani, D.N., Shukla, A.K., Tiwari, R., Sundaresan, V., 2016a. DNA  
411 barcoding: An efficient tool to overcome authentication challenges in the herbal market. *Plant Biotechnol. J.*  
412 14, 8–21. <https://doi.org/10.1111/pbi.12419>
- 413 Mishra, P., Kumar, A., Nagireddy, A., Mani, D.N., Shukla, A.K., Tiwari, R., Sundaresan, V., 2016b. DNA  
414 barcoding: An efficient tool to overcome authentication challenges in the herbal market. *Plant Biotechnol. J.*  
415 14, 8–21. <https://doi.org/10.1111/pbi.12419>
- 416 Newmaster, S.G., Grguric, M., Shanmughanandhan, D., Ramalingam, S. and Ragupathy, S., 2013. DNA  
417 barcoding detects contamination and substitution in North American herbal products. *BMC Med.*, 11,1-13.  
418 <https://doi.org/10.1186/1741-7015-11-222>
- 419 Noh, P., Kim, W.J., Yang, S., Choi, G., Moon, B.C., 2021. PCR-based rapid diagnostic tools for the authentication  
420 of medicinal mistletoe species. *Phytomedicine* 91, 153667. <https://doi.org/10.1016/j.phymed.2021.153667>
- 421 Pandit, R., Travadi, T., Sharma, S., Joshi, C., Joshi, M., 2021. DNA meta-barcoding using rbcL based mini-  
422 barcode revealed presence of unspecified plant species in Ayurvedic polyherbal formulations. *Phytochem.*  
423 *Anal.* 32, 804–810. <https://doi.org/10.1002/pca.3026>
- 424 Parveen, I., Gafner, S., Techen, N., Murch, S.J., Khan, I.A., 2016. DNA barcoding for the identification of  
425 botanicals in herbal medicine and dietary supplements: strengths and limitations. *Planta Med.* 82, 1225–1235.
- 426 Pawluczyk, M., Weiss, J., Links, M.G., Egaña Aranguren, M., Wilkinson, M.D., Egea-Cortines, M., 2015.  
427 Quantitative evaluation of bias in PCR amplification and next-generation sequencing derived from  
428 metabarcoding samples. *Anal. Bioanal. Chem.* 407, 1841–1848. <https://doi.org/10.1007/s00216-014-8435-y>
- 429 Raclariu, A.C., Heinrich, M., Ichim, M.C., de Boer, H., 2018a. Benefits and Limitations of DNA Barcoding and  
430 Metabarcoding in Herbal Product Authentication. *Phytochem. Anal.* 29, 123–128.  
431 <https://doi.org/10.1002/pca.2732>

- 432 Raclariu, A. C., Mocan, A., Popa, M.O., Vlase, L., Ichim, M.C., Crisan, G., Brysting, A.K., de Boer, H., 2017.  
433 *Veronica officinalis* product authentication using DNA metabarcoding and HPLC-MS reveals widespread  
434 adulteration with *Veronica chamaedrys*. *Front. Pharmacol.* 8, 378.
- 435 Raclariu, A. C., Paltinean, R., Vlase, L., Labarre, A., Manzanilla, V., Ichim, M.C., Crisan, G., Brysting, A.K., De  
436 Boer, H., 2017. Comparative authentication of *Hypericum perforatum* herbal products using DNA  
437 metabarcoding, TLC and HPLC-MS. *Sci. Rep.* 7, 8–10. <https://doi.org/10.1038/s41598-017-01389-w>
- 438 Raclariu, A.C., Țebrencu, C.E., Ichim, M.C., Ciupercă, O.T., Brysting, A.K., de Boer, H., 2018b. What's in the  
439 box? Authentication of *Echinacea* herbal products using DNA metabarcoding and HPTLC. *Phytomedicine* 44,  
440 32–38. <https://doi.org/10.1016/j.phymed.2018.03.058>
- 441 Rozen, S., Skaletsky, H., 2000. Primer3 on the WWW for general users and for biologist programmers. *Methods*  
442 *Mol. Biol.* 132, 365–386. <https://doi.org/10.1385/1-59259-192-2:365>
- 443 Sahoo, N., Manchikanti, P., 2013. Herbal drug regulation and commercialization: An indian industry perspective.  
444 *J. Altern. Complement. Med.* 19, 957–963. <https://doi.org/10.1089/acm.2012.0275>
- 445 Salipante, S.J., Kawashima, T., Rosenthal, C., Hoogestraat, D.R., Cummings, L.A., Sengupta, D.J., Harkins, T.T.,  
446 Cookson, B.T., Hoffman, N.G., 2014. Performance comparison of Illumina and Ion Torrent next-generation  
447 sequencing platforms for 16S rRNA-based bacterial community profiling. *Appl. Environ. Microbiol.* 80,  
448 7583–7591. <https://doi.org/10.1128/AEM.02206-14>
- 449 Schmieder, R., Edwards, R., 2011. Quality control and preprocessing of metagenomic datasets. *Bioinformatics*  
450 27, 863–864. <https://doi.org/10.1093/bioinformatics/btr026>
- 451 Seethapathy, G.S., Ganesh, D., Santhosh Kumar, J.U., Senthilkumar, U., Newmaster, S.G., Ragupathy, S., Uma  
452 Shaanker, R., Ravikanth, G., 2015. Assessing product adulteration in natural health products for laxative  
453 yielding plants, *Cassia*, *Senna*, and *Chamaecrista*, in Southern India using DNA barcoding. *Int. J. Legal Med.*  
454 129, 693–700. <https://doi.org/10.1007/s00414-014-1120-z>
- 455 Seethapathy, G.S., Raclariu-Manolica, A.-C., Anmarkrud, J.A., Wangenstein, H., De Boer, H.J., 2019. DNA  
456 metabarcoding authentication of Ayurvedic herbal products on the European market raises concerns of quality  
457 and fidelity. *Front. Plant Sci.* 10, 68.
- 458 Sharma, S., Shrivastava, N., 2016. Internal transcribed spacer guided multiplex PCR for species identification of  
459 *Convolvulus prostratus* and *Evolvulus alsinoides*. *Acta Pharm. Sin. B* 6, 253–258.  
460 <https://doi.org/10.1016/j.apsb.2016.02.003>

- 461 Shinomol G.K., Muralidhara, M.S. Bharath, M., 2011. Exploring the Role of “Brahmi” (*Bacopa monnieri* and  
462 *Centella asiatica*) in Brain Function and Therapy. *Recent Pat. Endocr. Metab. Immune Drug Discov.* 5, 33–  
463 49. <https://doi.org/10.2174/187221411794351833>
- 464 Staats, M., Arulandhu, A.J., Gravendeel, B., Holst-Jensen, A., Scholtens, I., Peelen, T., Prins, T.W., Kok, E.,  
465 2016. Advances in DNA metabarcoding for food and wildlife forensic species identification. *Anal. Bioanal.*  
466 *Chem.* 408, 4615–4630. <https://doi.org/10.1007/s00216-016-9595-8>
- 467 Thakur, V.V., Tiwari, S., Tripathi, N., Tiwari, G., 2019. Molecular identification of medicinal plants with  
468 amplicon length polymorphism using universal DNA barcodes of the *atpF–atpH*, *trnL* and *trnH–psbA* regions.  
469 *3 Biotech* 9, 1–10. <https://doi.org/10.1007/s13205-019-1724-6>
- 470 Travadi, T., Sharma, S., Pandit, R., Nakrani, M., Joshi, C., Joshi, M., 2022. A duplex PCR assay for authentication  
471 of *Ocimum basilicum* L. and *Ocimum tenuiflorum* L. in Tulsi churna. *Food Control* 137, 108790.  
472 <https://doi.org/10.1016/j.foodcont.2021.108790>
- 473 Vassou, S.L., Nithaniyal, S., Raju, B., Parani, M., 2016. Creation of reference DNA barcode library and  
474 authentication of medicinal plant raw drugs used in Ayurvedic medicine. *BMC Complement. Altern. Med.* 16.  
475 <https://doi.org/10.1186/s12906-016-1086-0>
- 476 Xin, T., Xu, Z., Jia, J., Leon, C., Hu, S., Lin, Y., Ragupathy, S., Song, J., Newmaster, S.G., 2018. Biomonitoring  
477 for traditional herbal medicinal products using DNA metabarcoding and single molecule, real-time  
478 sequencing. *Acta Pharm. Sin. B* 8, 488–497. <https://doi.org/10.1016/j.apsb.2017.10.001>
- 479 Yadav, A., Ahmad, J., Chaudhary, A.A., Ahmad, A., 2012. Development of sequence characterized amplified  
480 region (SCAR) marker for the authentication of *Bacopa monnieri* (L.) Wettst. *European J. Med. Plants* 186–  
481 198.
- 482 Zhang, X., Zhou, T., Yu, W., Ai, J., Wang, X., Gao, L., Yuan, G., Li, M., 2018. Development and evaluation of  
483 a PCR-based assay kit for authentication of *Zaocys dhumnades* in traditional Chinese medicine. *Mitochondrial*  
484 *DNA Part A DNA Mapping, Seq. Anal.* 29, 102–106. <https://doi.org/10.1080/24701394.2016.1248429>

## 485 **Captions for Figures**

486 **Figure 1.** PCR assay of simulated blended formulations using *Bacopa monnieri* (BM) and  
487 *Centella asiatica* (CA) specific primers. BM (100) =100% *Bacopa monnieri*; CA (100) = 100%  
488 *Centella asiatica*; BM (75) & CA (25) = mixture of 75% of BM and 25% of CA; BM (50) &  
489 CA (50) = mixture of 50% of BM and 50% of CA; BM (25) & CA (75) = mixture of 25% of

490 BM and 75% of CA; N= No template control; M= 100 bp ladder. (a) PCR assay of simulated  
491 blended formulations using BM primers (b) PCR assay of simulated blended formulations  
492 using CA primers

493 **Figure 2.** PCR assay of Brahmi market samples using *Bacopa monnieri* (BM) and *Centella*  
494 *asiatica* (CA) specific primers. 99, 100, 101, 102, 159, 203, 214 to 224, V47 = market sample  
495 IDs; N= No template control; M= 100 bp ladder.

496 **Figure 3.** Relative abundance of botanicals at Genus level in Brahmi herbal products using  
497 DNA metabarcoding.

498 **Figure 4.** *Bacopa monnieri*, *Centella asiatica*, and other non-targeted botanicals detected in  
499 Brahmi herbal products (a) Heat map showing the relative abundance of targeted and nontarget  
500 botanicals present within Brahmi herbal products (b) Family level distribution of botanicals  
501 detected within Brahmi herbal products

502 **Figure 5.** HPLC chromatograms of Brahmi herbal products. Bacoside A components Bacoside  
503 A3, Bacopaside II, Jujubogenin isomer of Bacopasaponine C, and Bacopasaponine C are  
504 indicated by arrows labeled 1, 2, 3, and 4 respectively. The peak of asiaticoside is marked with  
505 an arrow labeled with asiaticoside.

506

507

## Table

508

**Table 1.** Raw data of DNA metabarcoding

| Samples      | Before filtering |                | After filtering |                           |                | Total clusters | clusters having below 5 reads | clusters having > 5 reads | analysed reads (i.e., total reads having > 5 clusters) | % of analysed reads |
|--------------|------------------|----------------|-----------------|---------------------------|----------------|----------------|-------------------------------|---------------------------|--------------------------------------------------------|---------------------|
|              | Total reads      | Mean bp length | Total reads     | % of total reads obtained | Mean bp length |                |                               |                           |                                                        |                     |
| 99           | 12204            | 288            | 7593            | 62.22                     | 335            | 1013           | 207                           | 806                       | 6467                                                   | 52.99               |
| 100          | 14039            | 308            | 9888            | 70.43                     | 338            | 737            | 135                           | 602                       | 9065                                                   | 64.57               |
| 101          | 21701            | 286            | 13478           | 62.11                     | 336            | 1808           | 291                           | 1517                      | 11304                                                  | 52.09               |
| 102          | 9484             | 307            | 6856            | 72.29                     | 336            | 925            | 129                           | 796                       | 5774                                                   | 60.88               |
| 159          | 726              | 315            | 592             | 81.54                     | 339            | 143            | 19                            | 124                       | 432                                                    | 59.50               |
| 203          | 2214             | 312            | 1788            | 80.76                     | 339            | 500            | 50                            | 450                       | 1196                                                   | 54.02               |
| 214          | 8115             | 319            | 7010            | 86.38                     | 337            | 1246           | 139                           | 1107                      | 5503                                                   | 67.81               |
| 215          | 5357             | 315            | 4555            | 85.03                     | 336            | 604            | 45                            | 559                       | 3861                                                   | 72.07               |
| 216          | 1461             | 313            | 1185            | 81.11                     | 339            | 315            | 42                            | 273                       | 802                                                    | 54.89               |
| 217          | 2568             | 315            | 2148            | 83.64                     | 338            | 471            | 45                            | 426                       | 1585                                                   | 61.72               |
| 218          | 3875             | 311            | 3142            | 81.08                     | 336            | 532            | 77                            | 455                       | 2534                                                   | 65.39               |
| 219          | 2166             | 319            | 1859            | 85.83                     | 338            | 433            | 54                            | 379                       | 1372                                                   | 63.34               |
| 220          | 3357             | 316            | 2810            | 83.71                     | 338            | 530            | 74                            | 456                       | 2204                                                   | 65.65               |
| 221          | 10615            | 322            | 9412            | 88.67                     | 337            | 1076           | 156                           | 920                       | 8180                                                   | 77.06               |
| 222          | 3448             | 315            | 2962            | 85.90                     | 338            | 642            | 83                            | 559                       | 2208                                                   | 64.04               |
| 223          | 3317             | 309            | 2720            | 82.00                     | 340            | 866            | 96                            | 770                       | 1569                                                   | 47.30               |
| 224          | 8854             | 323            | 7712            | 87.10                     | 338            | 793            | 105                           | 688                       | 6774                                                   | 76.51               |
| V47          | 6589             | 263            | 3785            | 57.44                     | 339            | 3147           | 1011                          | 2136                      | 2933                                                   | 44.51               |
| BS1          | 4673             | 317            | 4034            | 86.33                     | 339            | 505            | 83                            | 950                       | 3470                                                   | 74.26               |
| BS2          | 2959             | 328            | 2720            | 91.92                     | 339            | 233            | 35                            | 422                       | 2466                                                   | 83.34               |
| BS3          | 3386             | 318            | 2947            | 87.03                     | 339            | 438            | 82                            | 198                       | 2449                                                   | 72.33               |
| BS4          | 2118             | 316            | 1810            | 85.46                     | 339            | 305            | 43                            | 356                       | 1451                                                   | 68.51               |
| BS5          | 4901             | 323            | 4347            | 88.70                     | 340            | 585            | 95                            | 262                       | 3656                                                   | 74.60               |
| <b>Total</b> | <b>138127</b>    | <b>311.22</b>  | <b>105353</b>   | <b>76.27</b>              | <b>337.96</b>  | <b>17847</b>   | <b>3096</b>                   | <b>15211</b>              | <b>87255</b>                                           | <b>63.17</b>        |

509 Where, BS1: 100% *Bacopa monnieri* (BM); BS2: 100% *Centella asiatica* (CA); BS3: BM (75%) + CA (25%);

510 BS4: BM (50%) + CA (50%); BS5: BM (25%) + CA (75%)

511

512

**Table 2.** Comparative result of PCR assay, DNA metabarcoding and HPLC

| Sample                                                                | PCR assay using BM and CA primers |                          | Metabarcoding          |                          | HPLC                                  |                                           |
|-----------------------------------------------------------------------|-----------------------------------|--------------------------|------------------------|--------------------------|---------------------------------------|-------------------------------------------|
|                                                                       | <i>Bacopa monnieri</i>            | <i>Centella asiatica</i> | <i>Bacopa monnieri</i> | <i>Centella asiatica</i> | Bacoside A ( <i>Bacopa monnieri</i> ) | Asiaticoside ( <i>Centella asiatica</i> ) |
| 99                                                                    | -                                 | -                        |                        | -                        | -                                     | -                                         |
| 100                                                                   | -                                 | +                        | -                      | <b>+ (99.65% read)</b>   | -                                     | +                                         |
| 101                                                                   | -                                 | -                        | -                      | -                        | -                                     | -                                         |
| 102                                                                   | -                                 | -                        | <b>+ (1.36% reads)</b> | -                        | +                                     | -                                         |
| 159                                                                   | -                                 | +                        | -                      | <b>+ (91.44% reads)</b>  | -                                     | +                                         |
| 203                                                                   | -                                 | -                        | -                      | -                        | -                                     | -                                         |
| 214                                                                   | -                                 | -                        | <b>+ (0.24% reads)</b> | -                        | +                                     | -                                         |
| 215                                                                   | -                                 | -                        | <b>+ (0.18% reads)</b> | -                        | -                                     | -                                         |
| 216                                                                   | -                                 | -                        | <b>+ (7.42% read)</b>  | -                        | +                                     | -                                         |
| 217                                                                   | -                                 | -                        | -                      | -                        | -                                     | -                                         |
| 218                                                                   | -                                 | -                        | -                      | -                        | -                                     | -                                         |
| 219                                                                   | -                                 | -                        | <b>+ (0.95% read)</b>  | -                        | +                                     | -                                         |
| 220                                                                   | +                                 | -                        | <b>+ (68.27% read)</b> | -                        | +                                     | -                                         |
| 221                                                                   | -                                 | -                        | -                      | -                        | -                                     | -                                         |
| 222                                                                   | -                                 | -                        | -                      | -                        | -                                     | -                                         |
| 223                                                                   | +                                 | -                        | <b>+ (12.24% read)</b> | <b>+ (2.04 % read)</b>   | +                                     | -                                         |
| 224                                                                   | -                                 | -                        | -                      | -                        | -                                     | -                                         |
| V47                                                                   | -                                 | -                        | -                      | <b>+(56.89% read)</b>    | -                                     | +                                         |
| Absolute (relative) number of samples in which BM and CA was detected | 4.0 (22.22%)                      |                          | 10.0 (55.56%)          |                          | 9.0 (50.0%)                           |                                           |

513

514 + sign represents detection of respective plant species; - sign represents absence of respective plant species, %

515 reads of BM and CA obtained in DNA metabarcoding is also represented.

516

517

## Figures



**Figure 1**

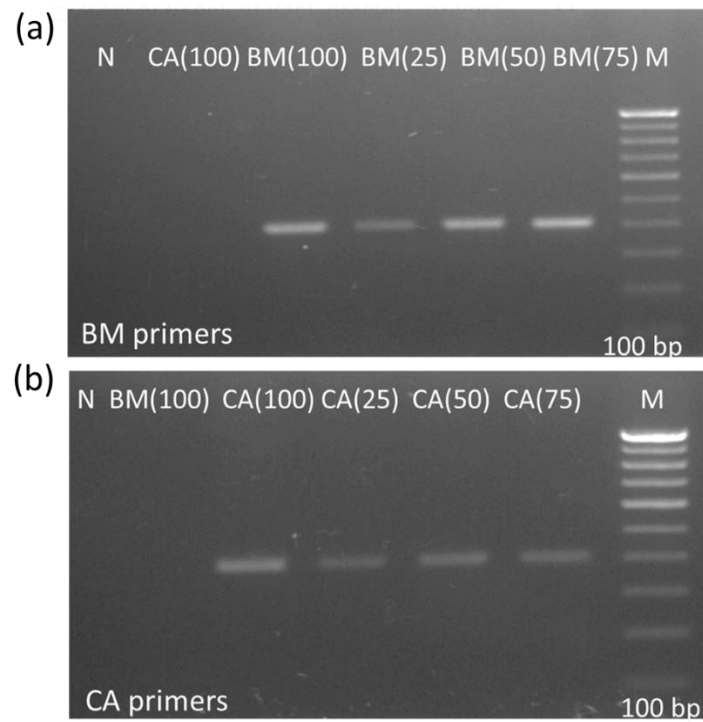

## Figure 2

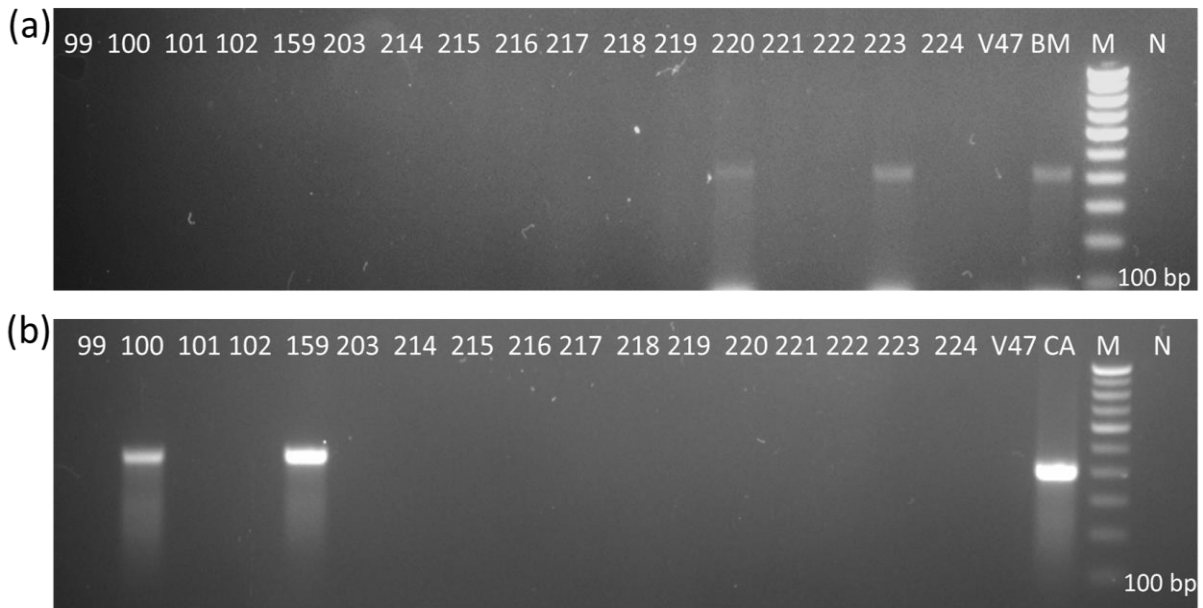

**Figure 3**

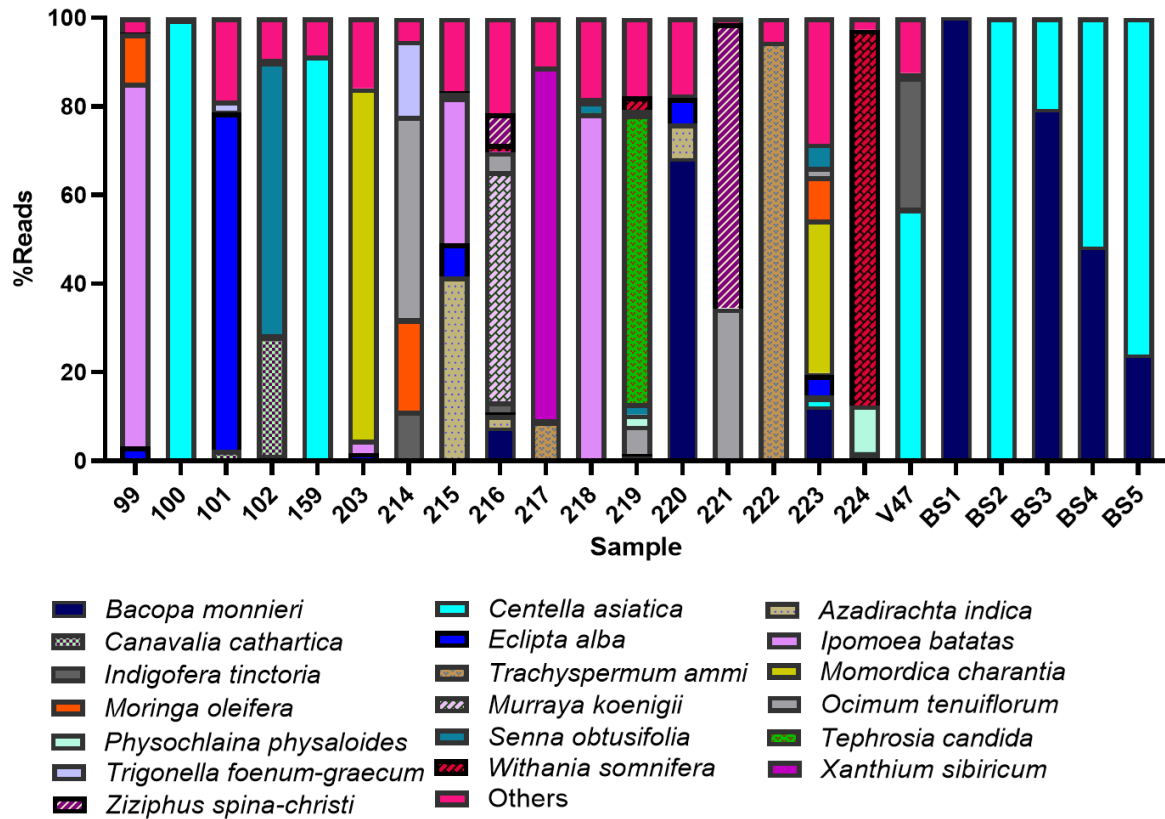

**Figure 4**

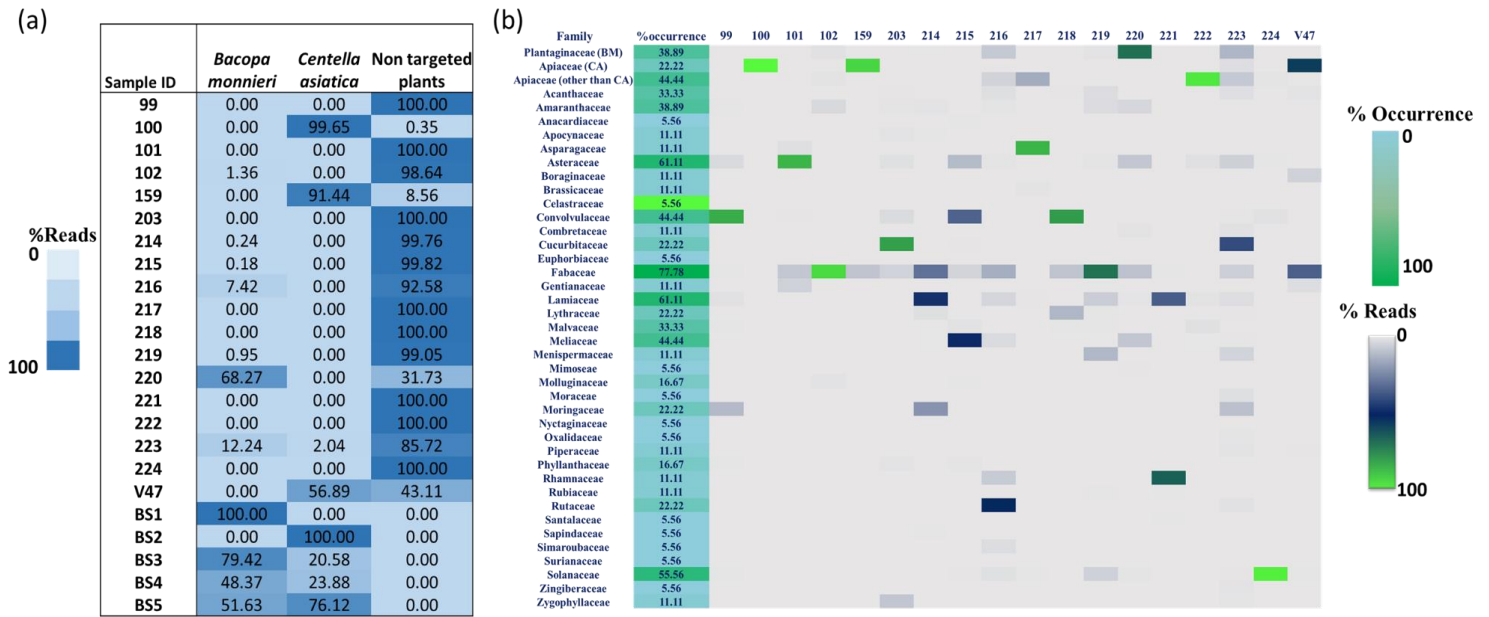

**Figure 5**

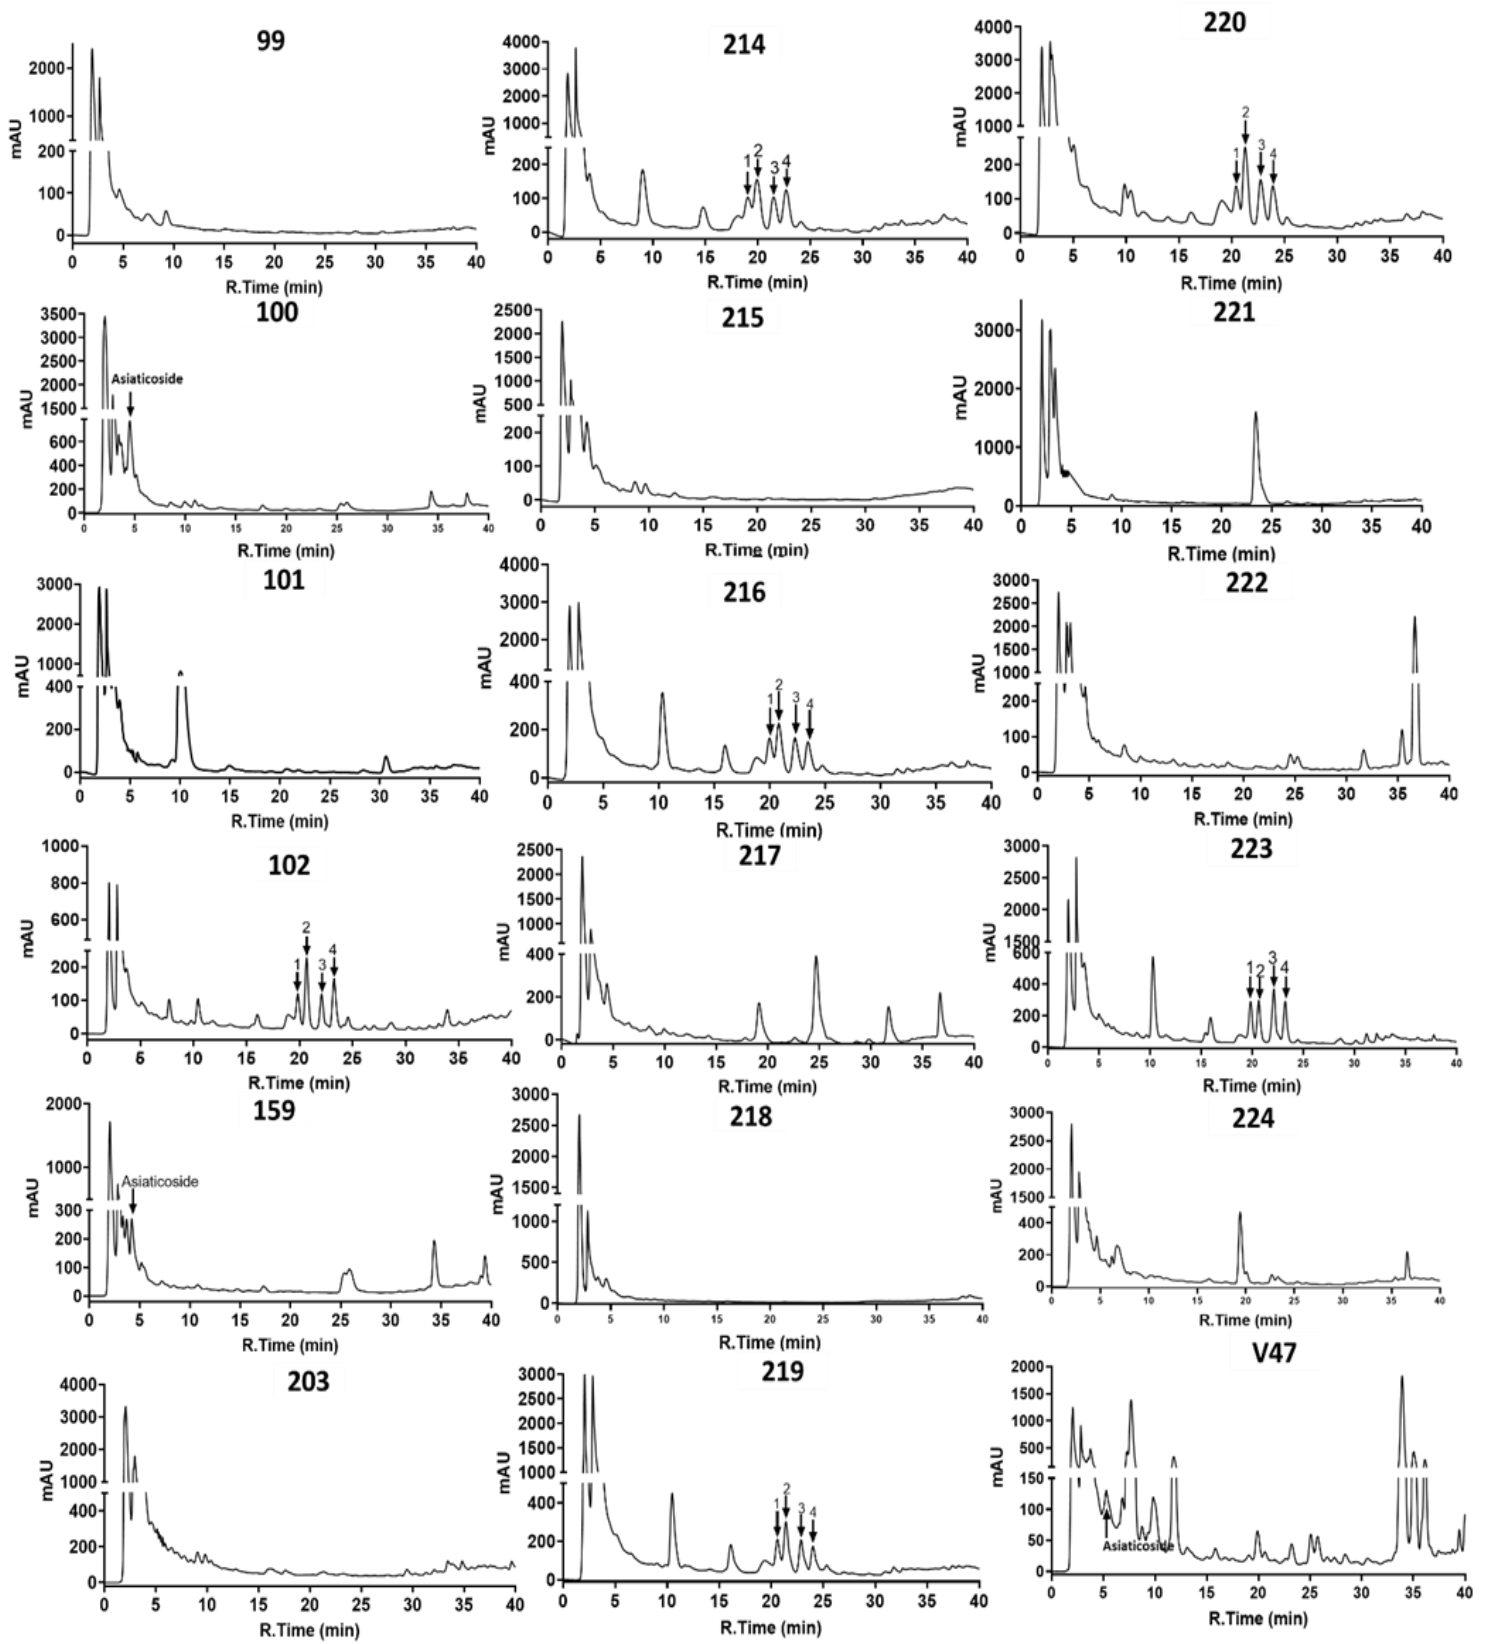

Source: https://www.biorxiv.org/content/10.1101/2022.07.30.501660v1.full.pdf
